# Supplementary material for: Airway basal cells show regionally distinct potential to undergo metaplastic differentiation
Source: eLife journal article supplement (doi:10.7554/elife.80083), 2022-09-30
Supplement: supp [file elife-80083-supp-v1.zip]

Archive with 12 entries (12 files):
- elife_poa_e80083_Figure_1_figure_supplement_1.pdf
- elife_poa_e80083_Figure_1_figure_supplement_2.pdf
- elife_poa_e80083_Figure_1_figure_supplement_3.pdf
- elife_poa_e80083_Figure_1_figure_supplement_4.pdf
- elife_poa_e80083_Figure_1_figure_supplement_5.pdf
- elife_poa_e80083_Figure_2_figure_supplement_1.pdf
- elife_poa_e80083_Figure_2_figure_supplement_2.pdf
- elife_poa_e80083_Figure_3_figure_supplement_1.pdf
- elife_poa_e80083_Figure_4_figure_supplement_1.pdf
- elife_poa_e80083_Figure_5_figure_supplement_1.pdf
- elife_poa_e80083_Figure_5_figure_supplement_2.pdf
- elife_poa_e80083_Figure_5_figure_supplement_3.pdf
