# Supplementary material for: Airway basal cells show regionally distinct potential to undergo metaplastic differentiation
Source: eLife journal article supplement (doi:10.7554/elife.80083), 2022-09-30
Supplement: supp [file elife-80083-supp-v1.zip › elife_poa_e80083_Figure_1_figure_supplement_1.pdf]

A

BC sorting (EPCAM<sup>+</sup> Lin<sup>-</sup> tdTom<sup>+</sup> CD104<sup>HI</sup>)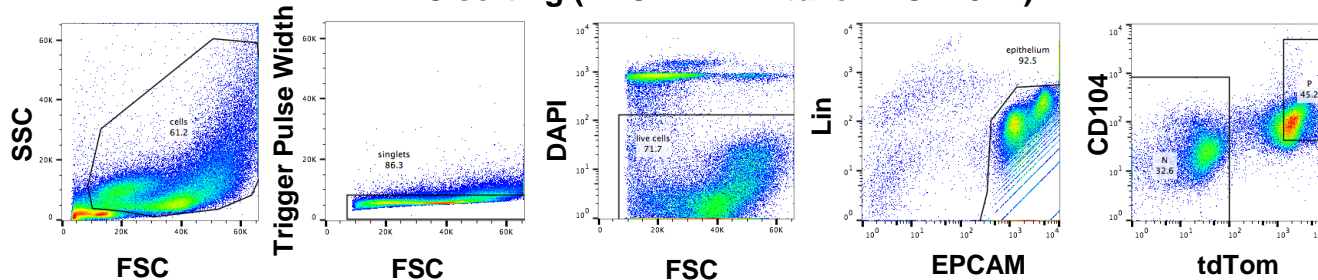

B

TRP63 tdTom KRT5 DAPI TRP63 tdTom KRT5

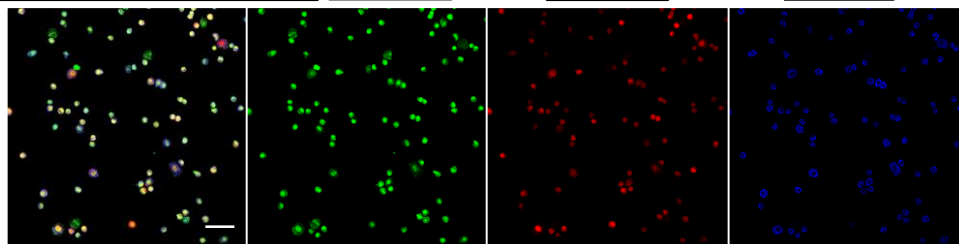

BC-1 BC-2

Basal-secretory Basal-squamous

Basal-mes-like Basal-proliferating

C

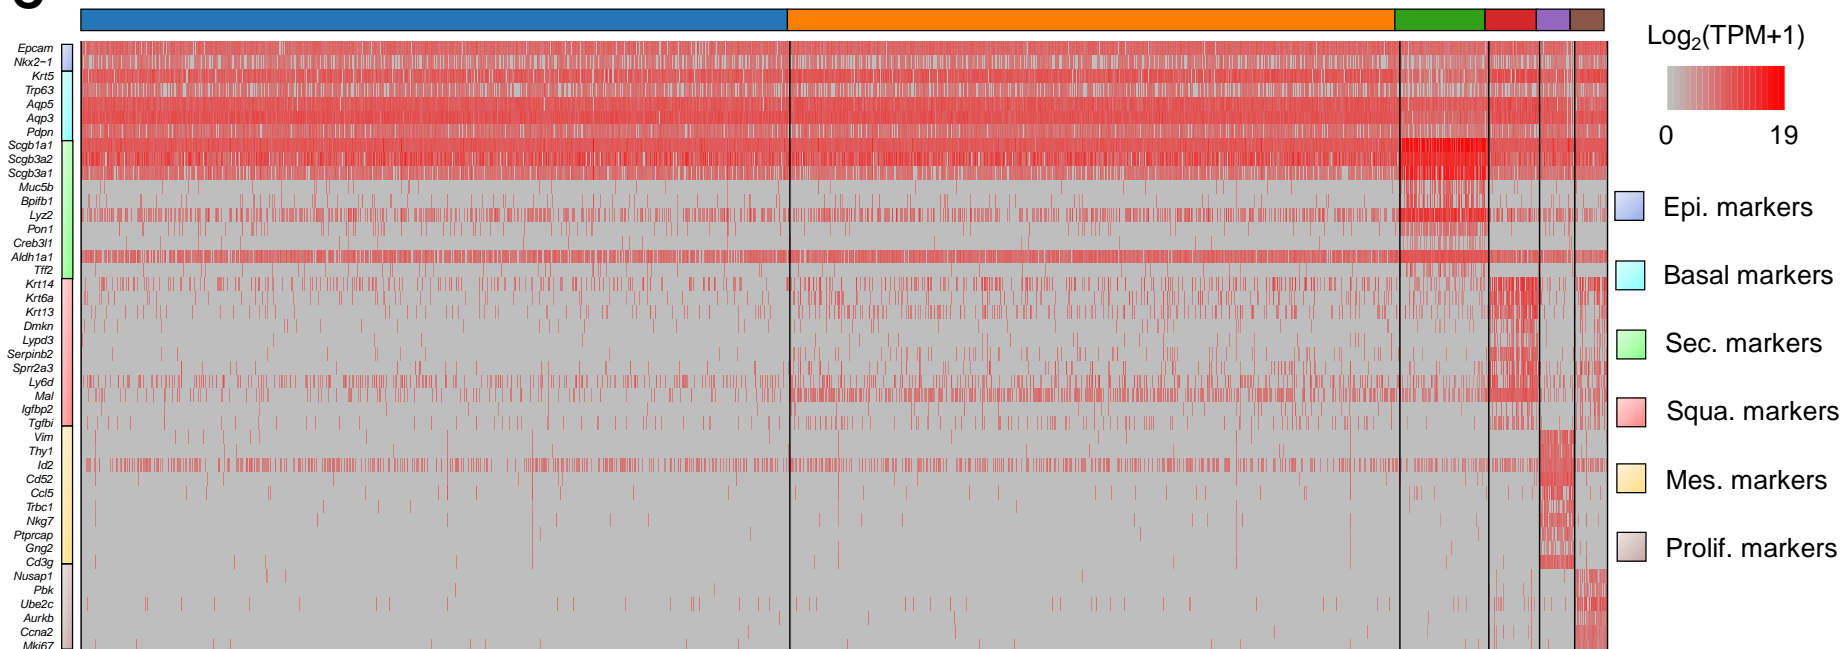

Figure 1-figure supplement 1
