# Supplementary figures and images for: Airway basal cells show regionally distinct potential to undergo metaplastic differentiation
Source: eLife journal article supplement (doi:10.7554/elife.80083), 2022-09-30

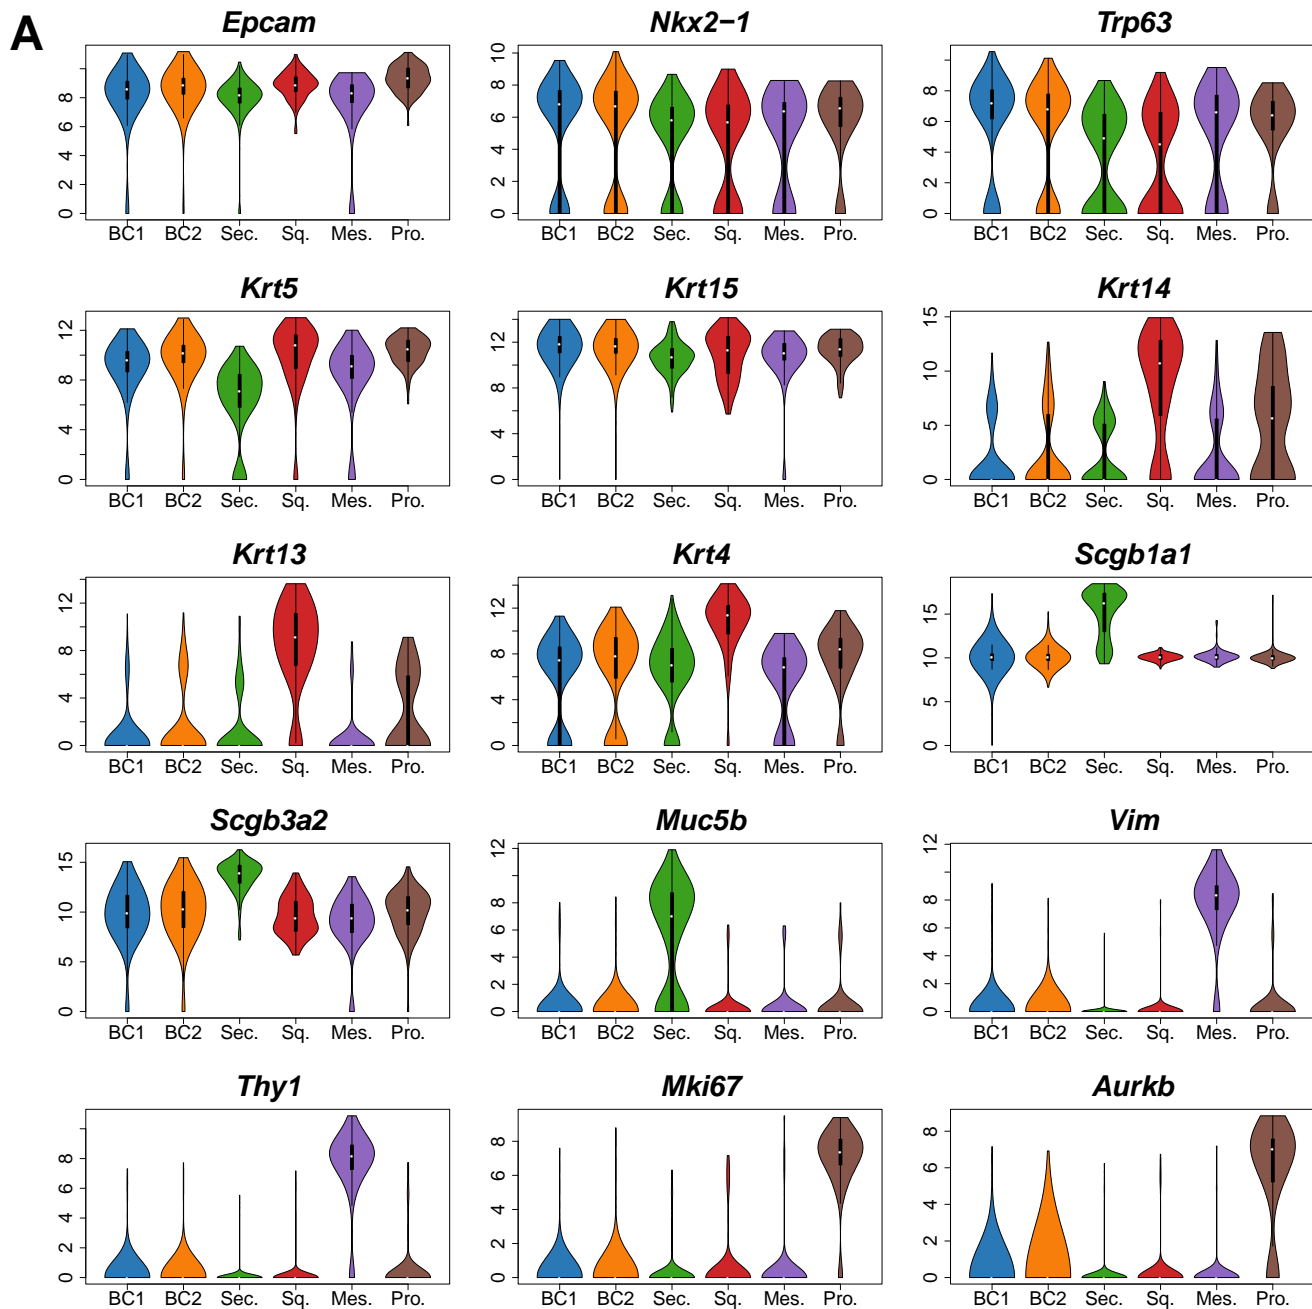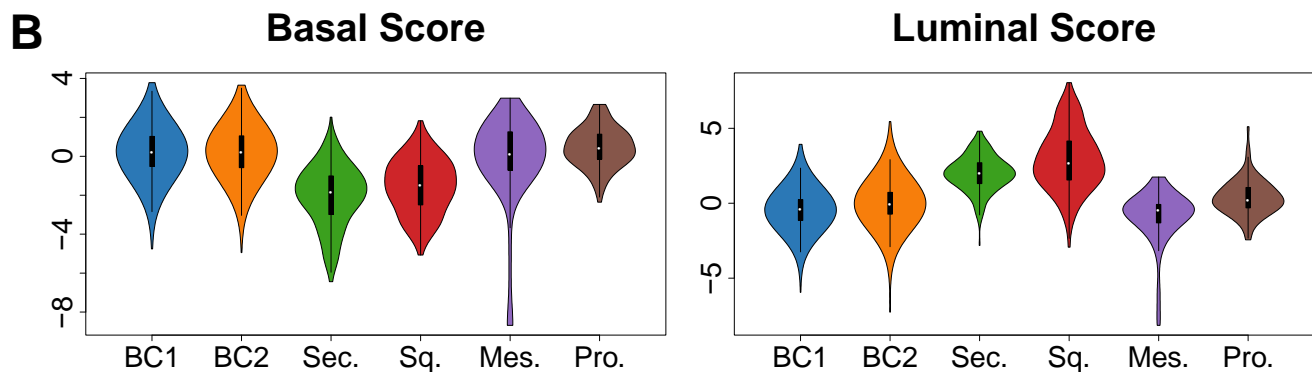

Figure 1-figure supplement 2

Supplement: supp [file elife-80083-supp-v1.zip › elife_poa_e80083_Figure_1_figure_supplement_2.pdf]

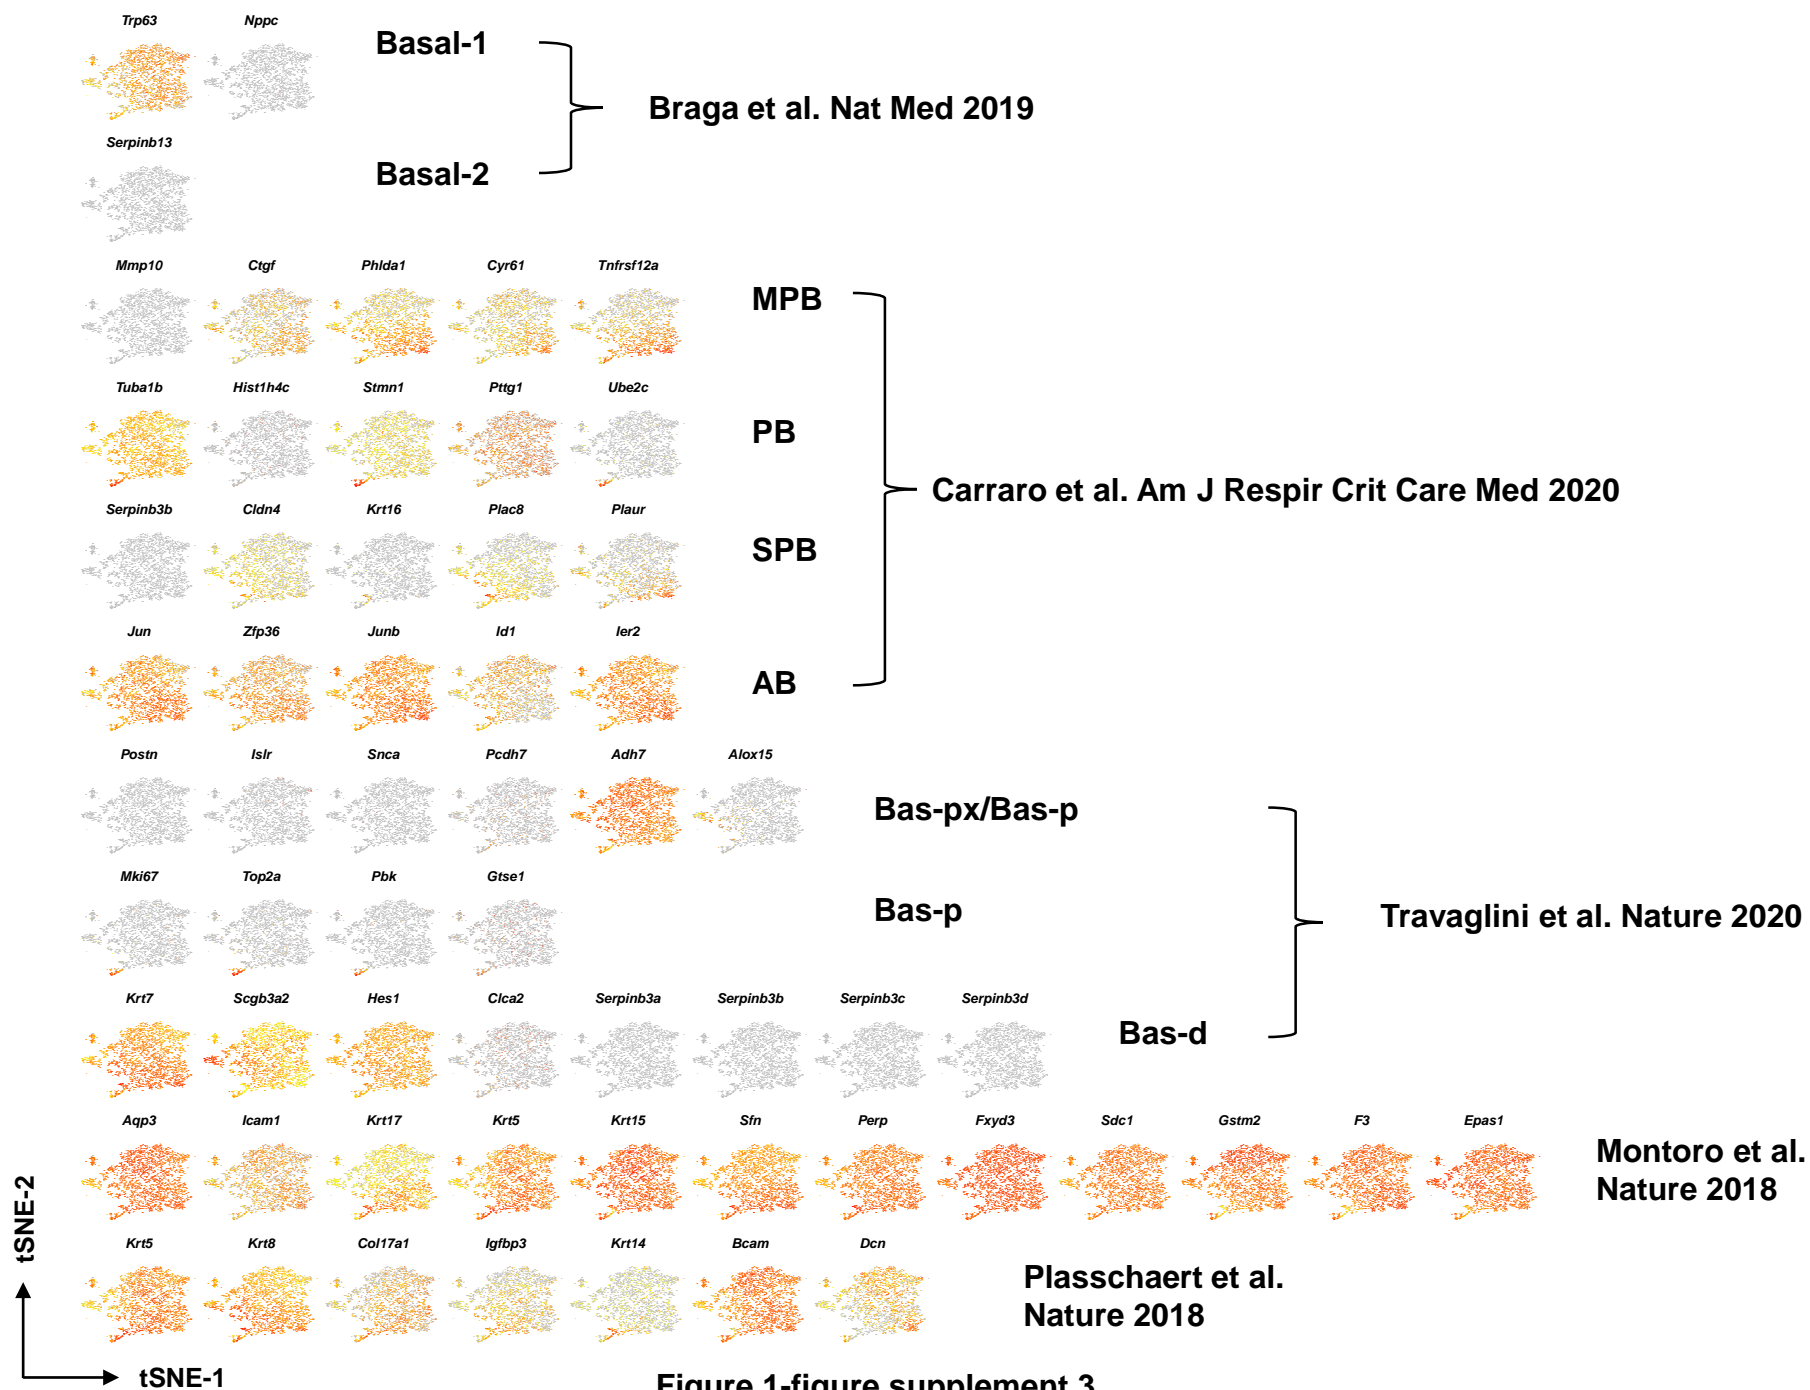

Supplement: supp [file elife-80083-supp-v1.zip › elife_poa_e80083_Figure_1_figure_supplement_3.pdf]

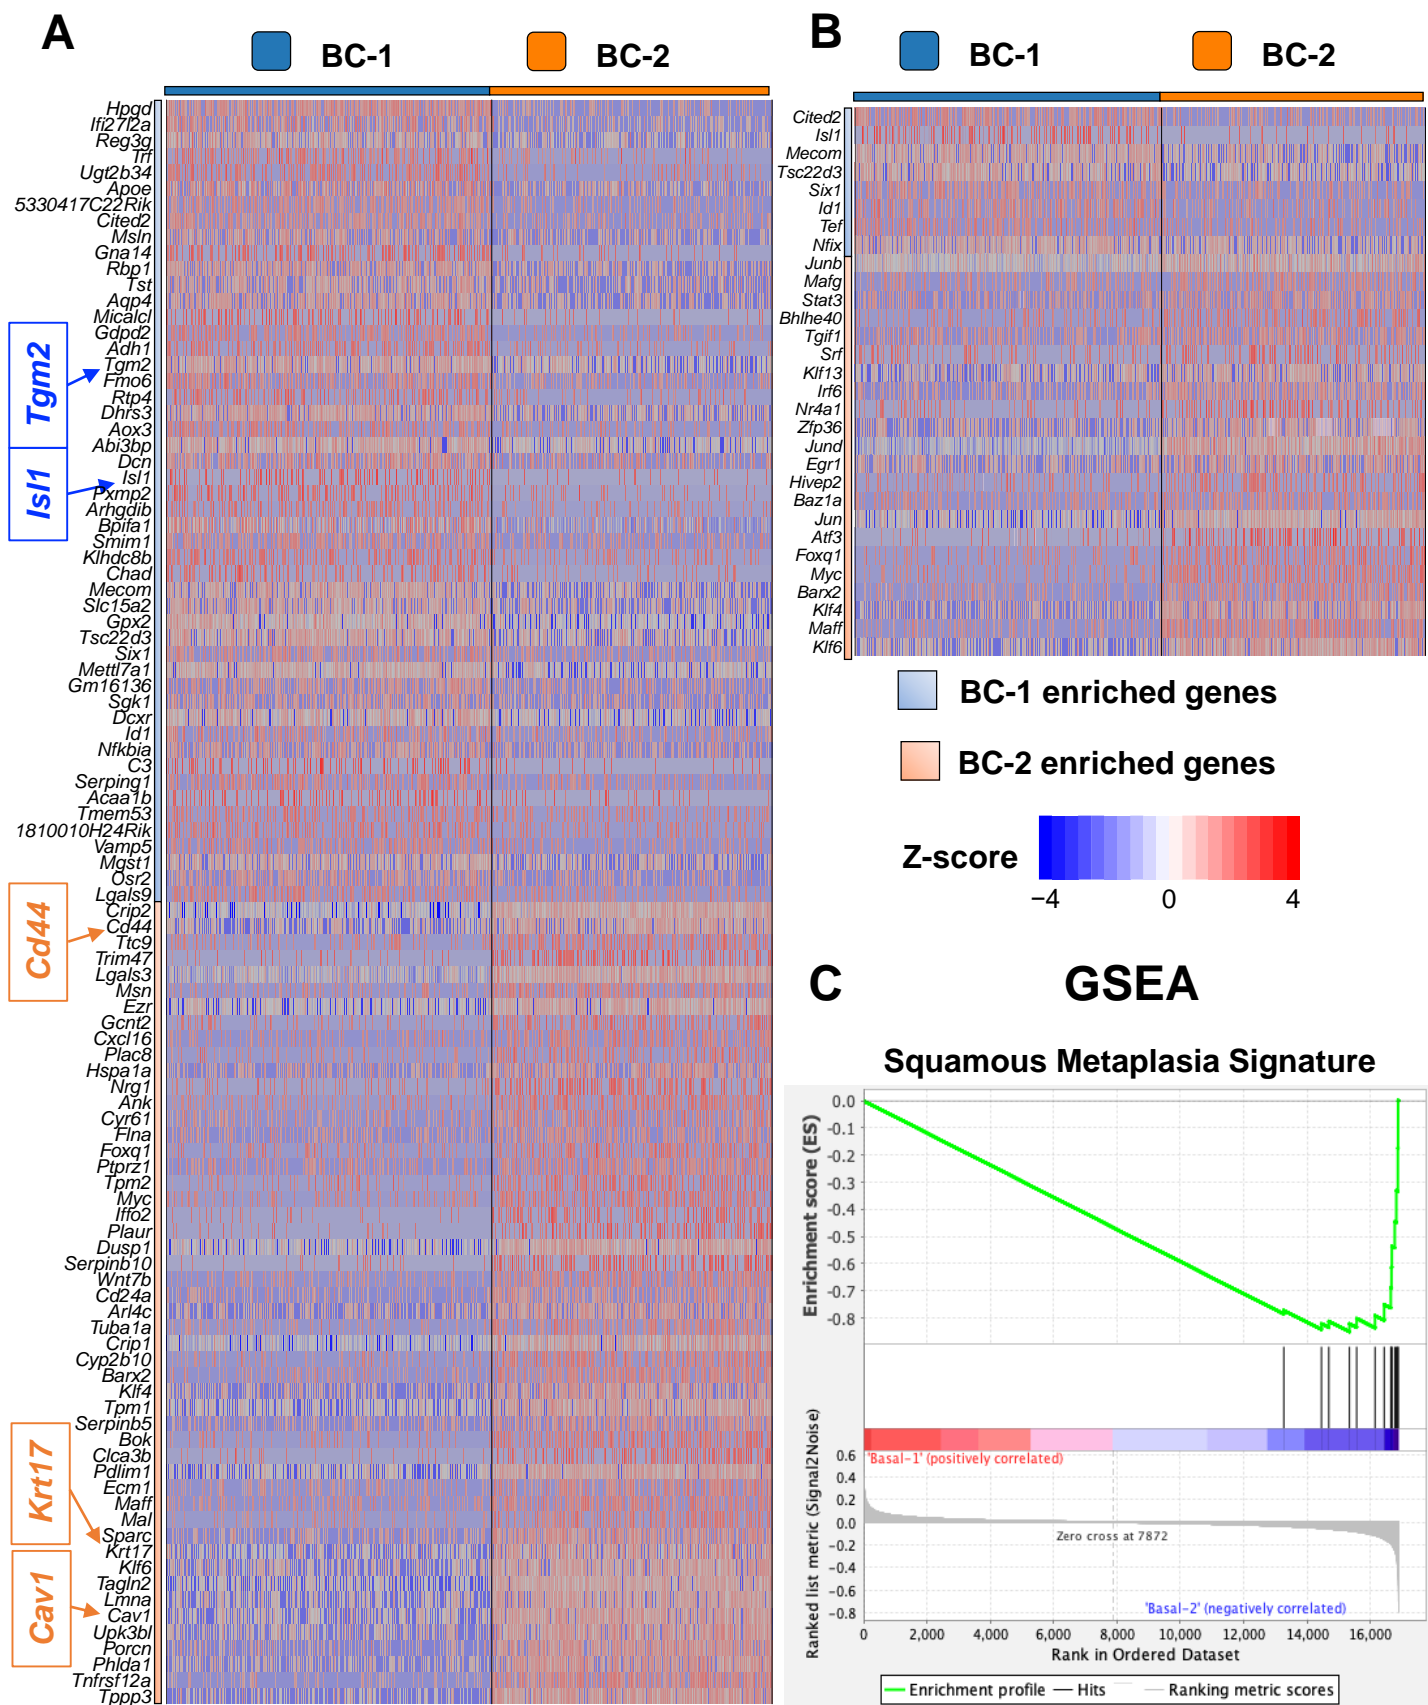

Figure 1-figure supplement 4

Supplement: supp [file elife-80083-supp-v1.zip › elife_poa_e80083_Figure_1_figure_supplement_4.pdf]

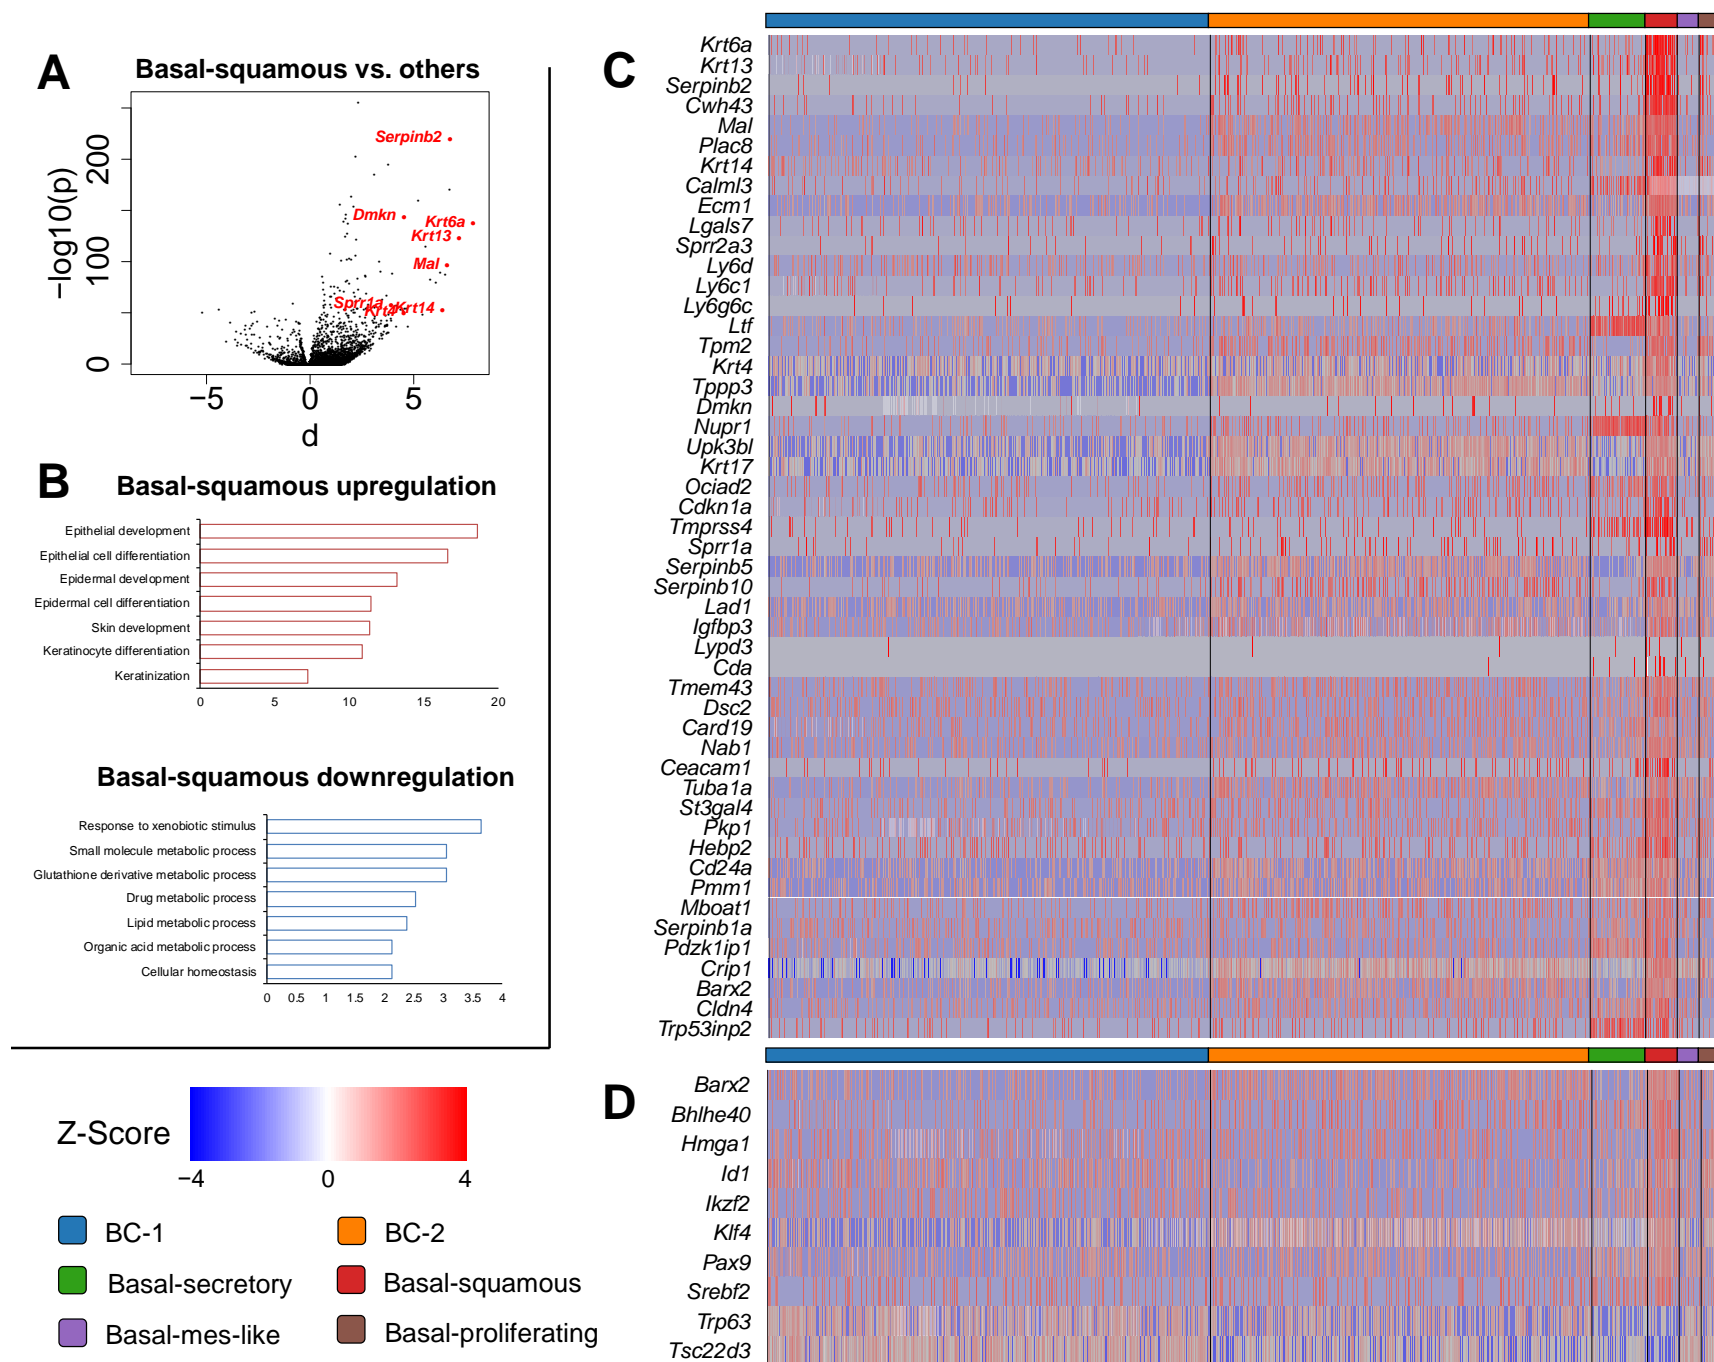

Figure 1-figure supplement 5

Supplement: supp [file elife-80083-supp-v1.zip › elife_poa_e80083_Figure_1_figure_supplement_5.pdf]

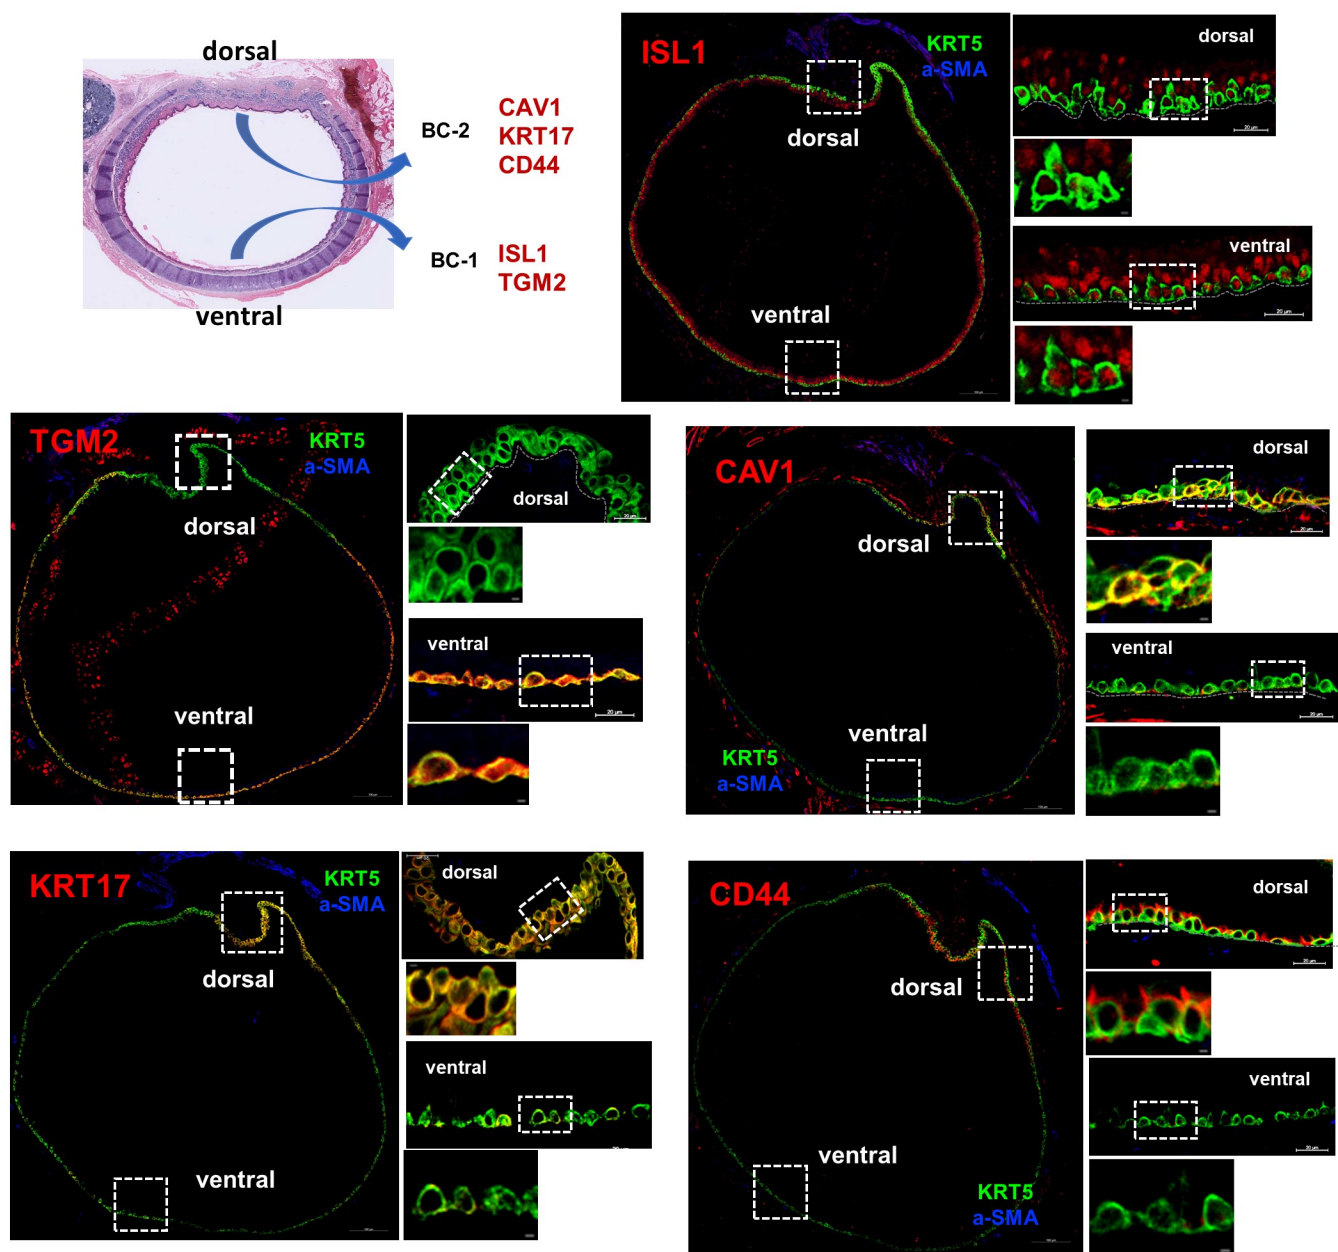

Figure 2-figure supplement 1

Supplement: supp [file elife-80083-supp-v1.zip › elife_poa_e80083_Figure_2_figure_supplement_1.pdf]

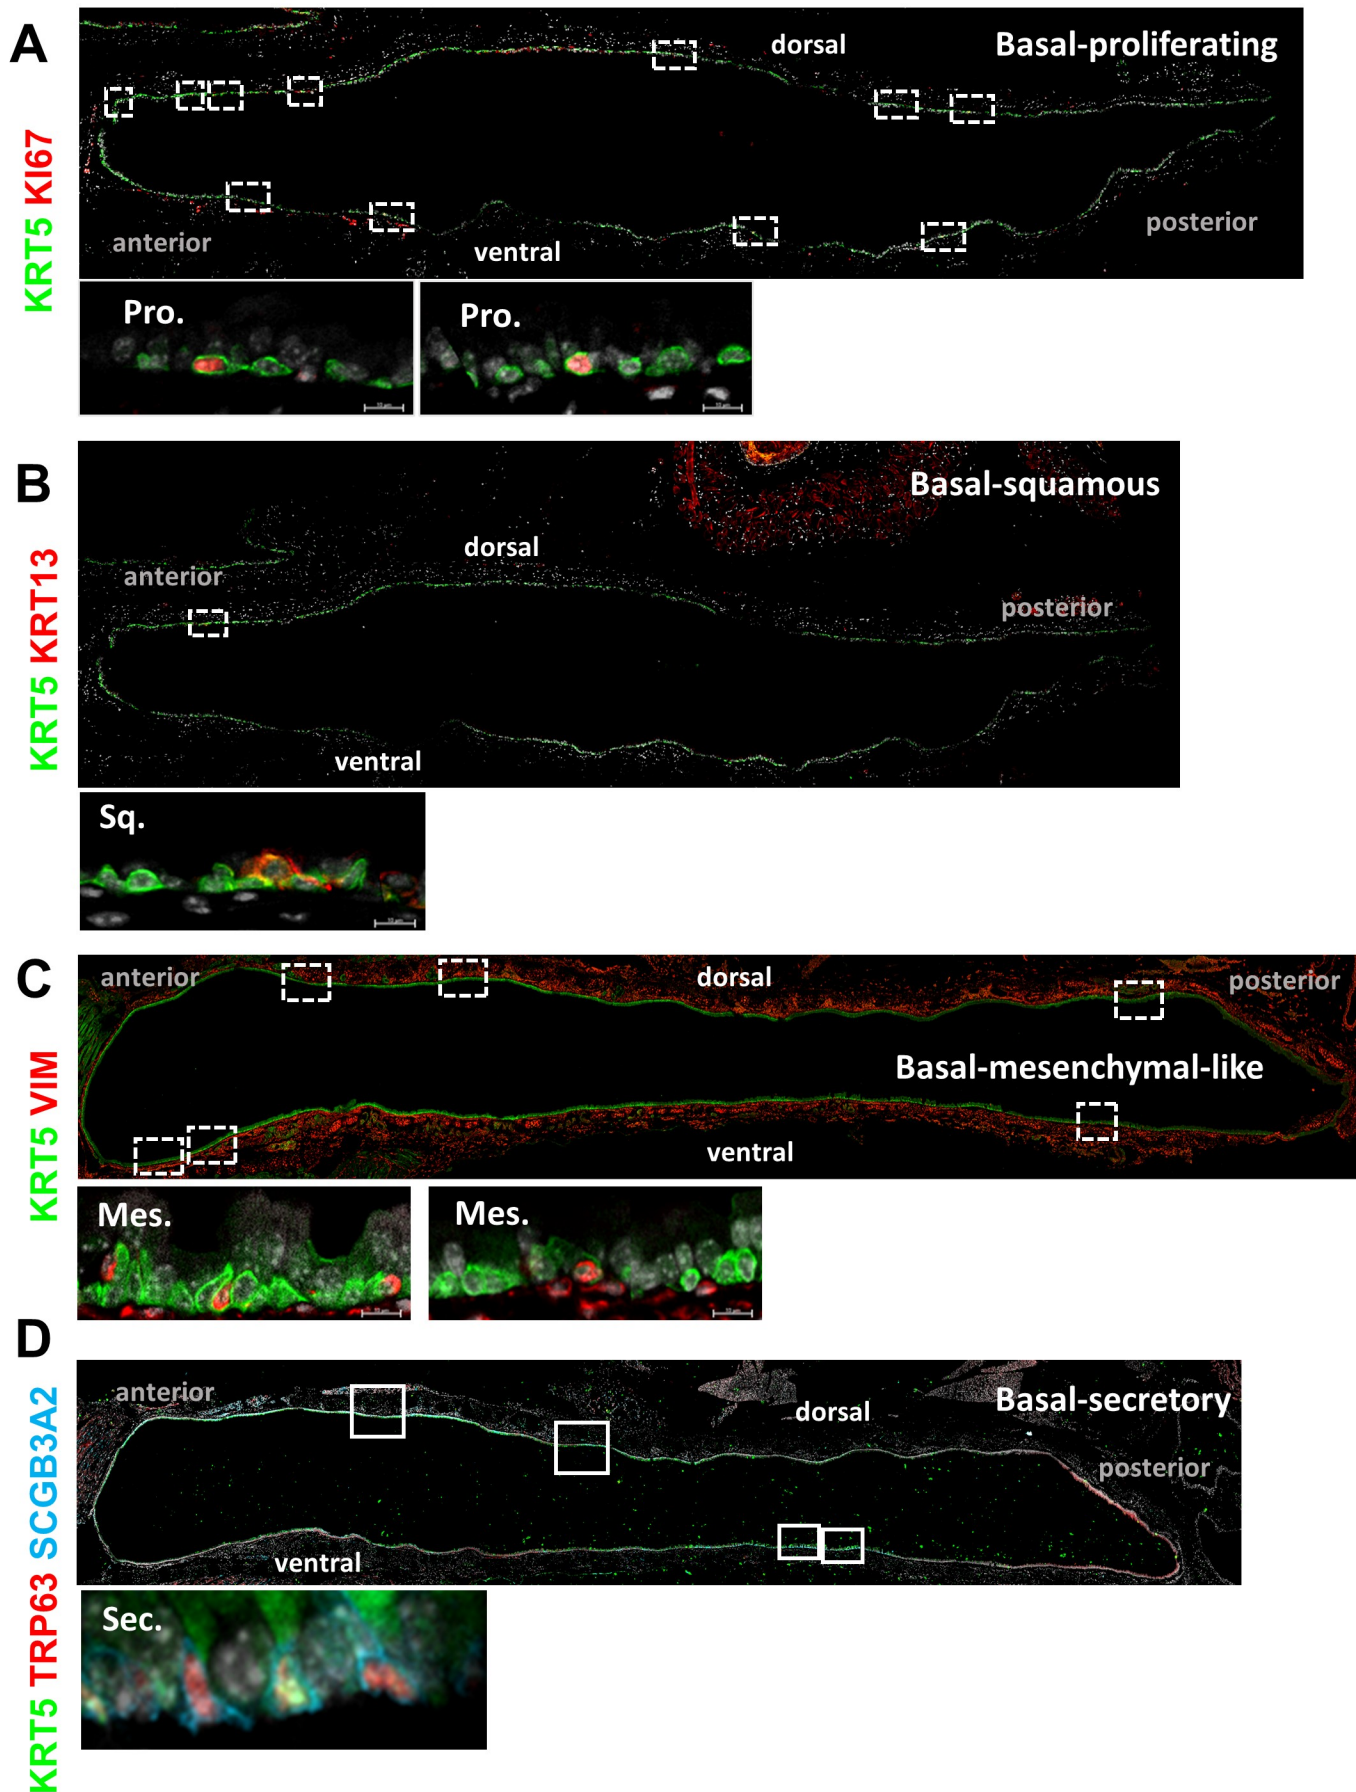

Figure 2-figure supplement 2

Supplement: supp [file elife-80083-supp-v1.zip › elife_poa_e80083_Figure_2_figure_supplement_2.pdf]

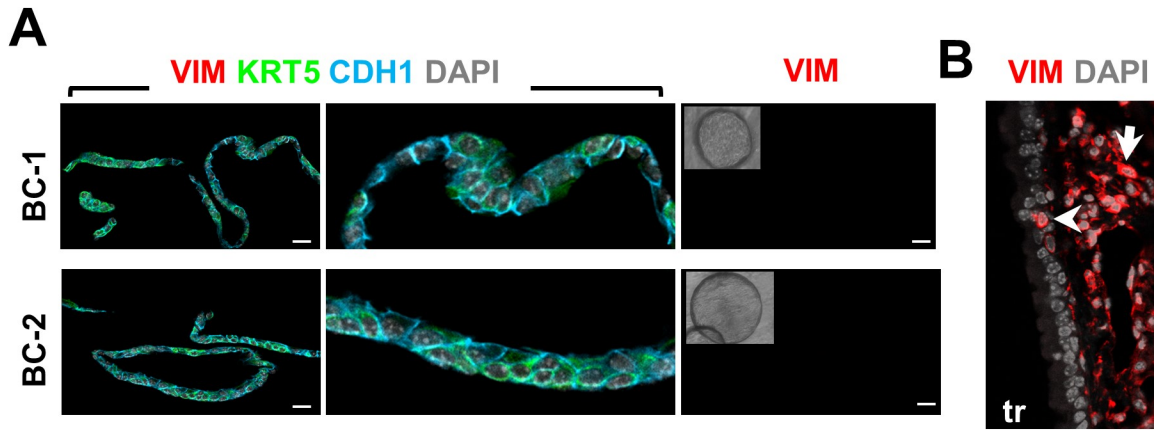

Figure 3-figure supplement 1

Supplement: supp [file elife-80083-supp-v1.zip › elife_poa_e80083_Figure_3_figure_supplement_1.pdf]

## Rare-LacZ

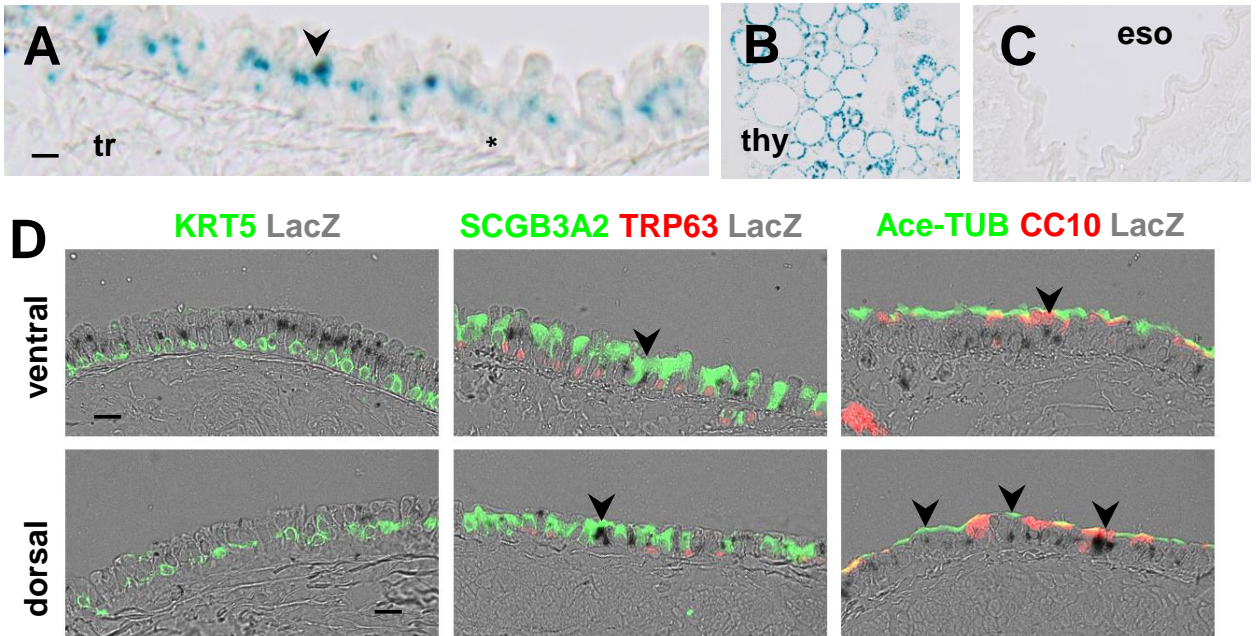

Figure 4-figure supplement 1

Supplement: supp [file elife-80083-supp-v1.zip › elife_poa_e80083_Figure_4_figure_supplement_1.pdf]

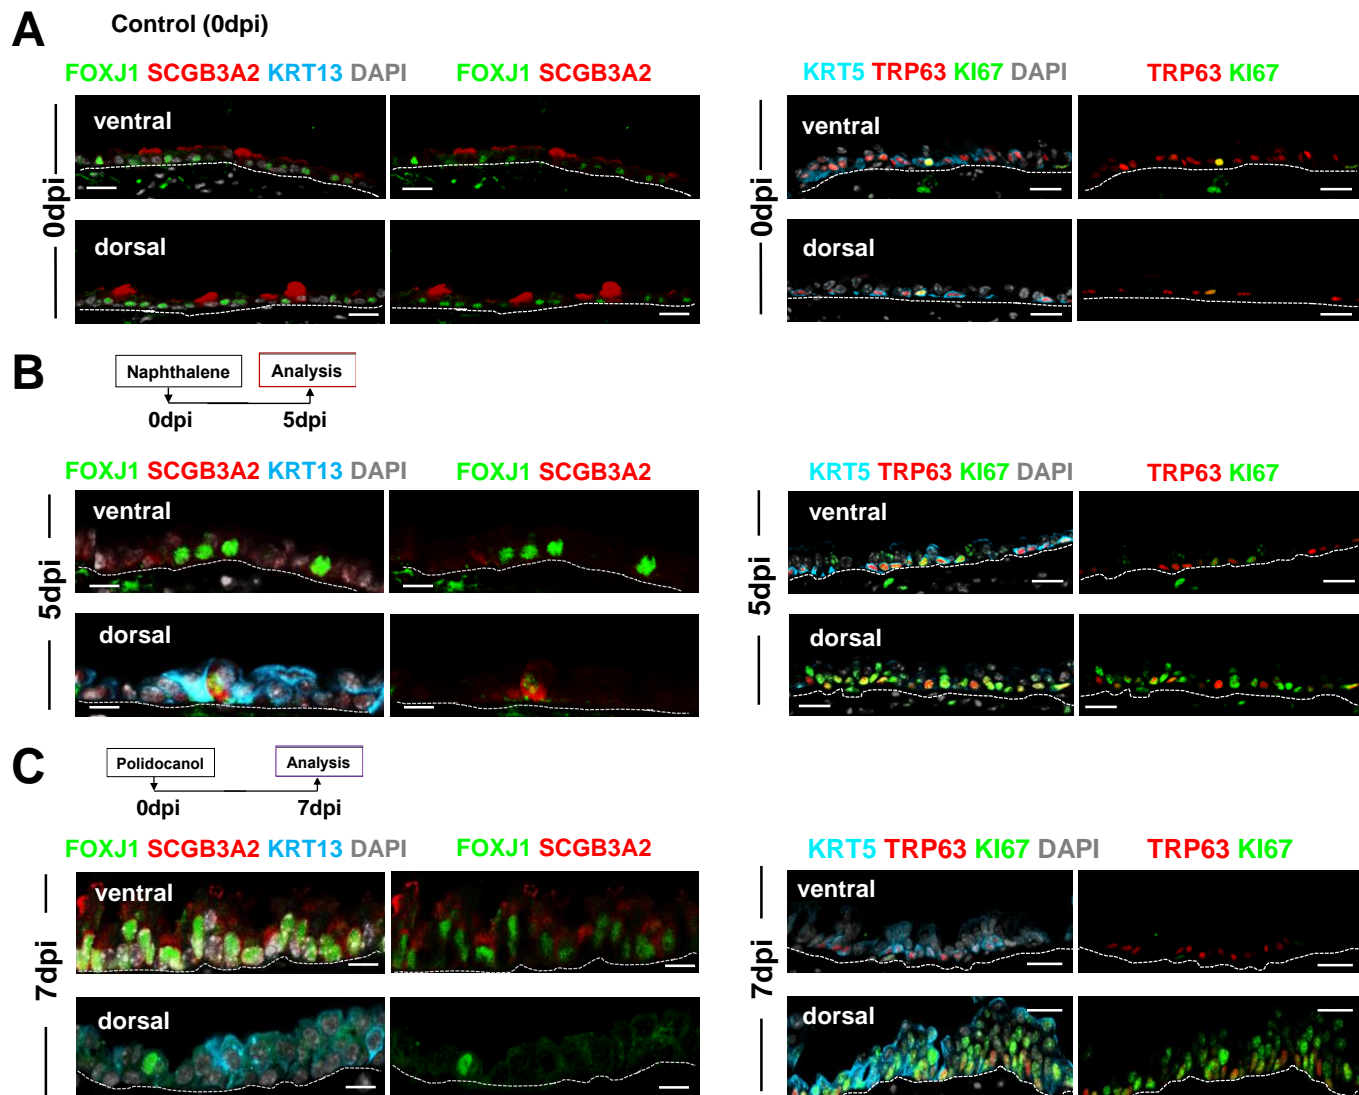

Figure 5-figure supplement 1

Supplement: supp [file elife-80083-supp-v1.zip › elife_poa_e80083_Figure_5_figure_supplement_1.pdf]

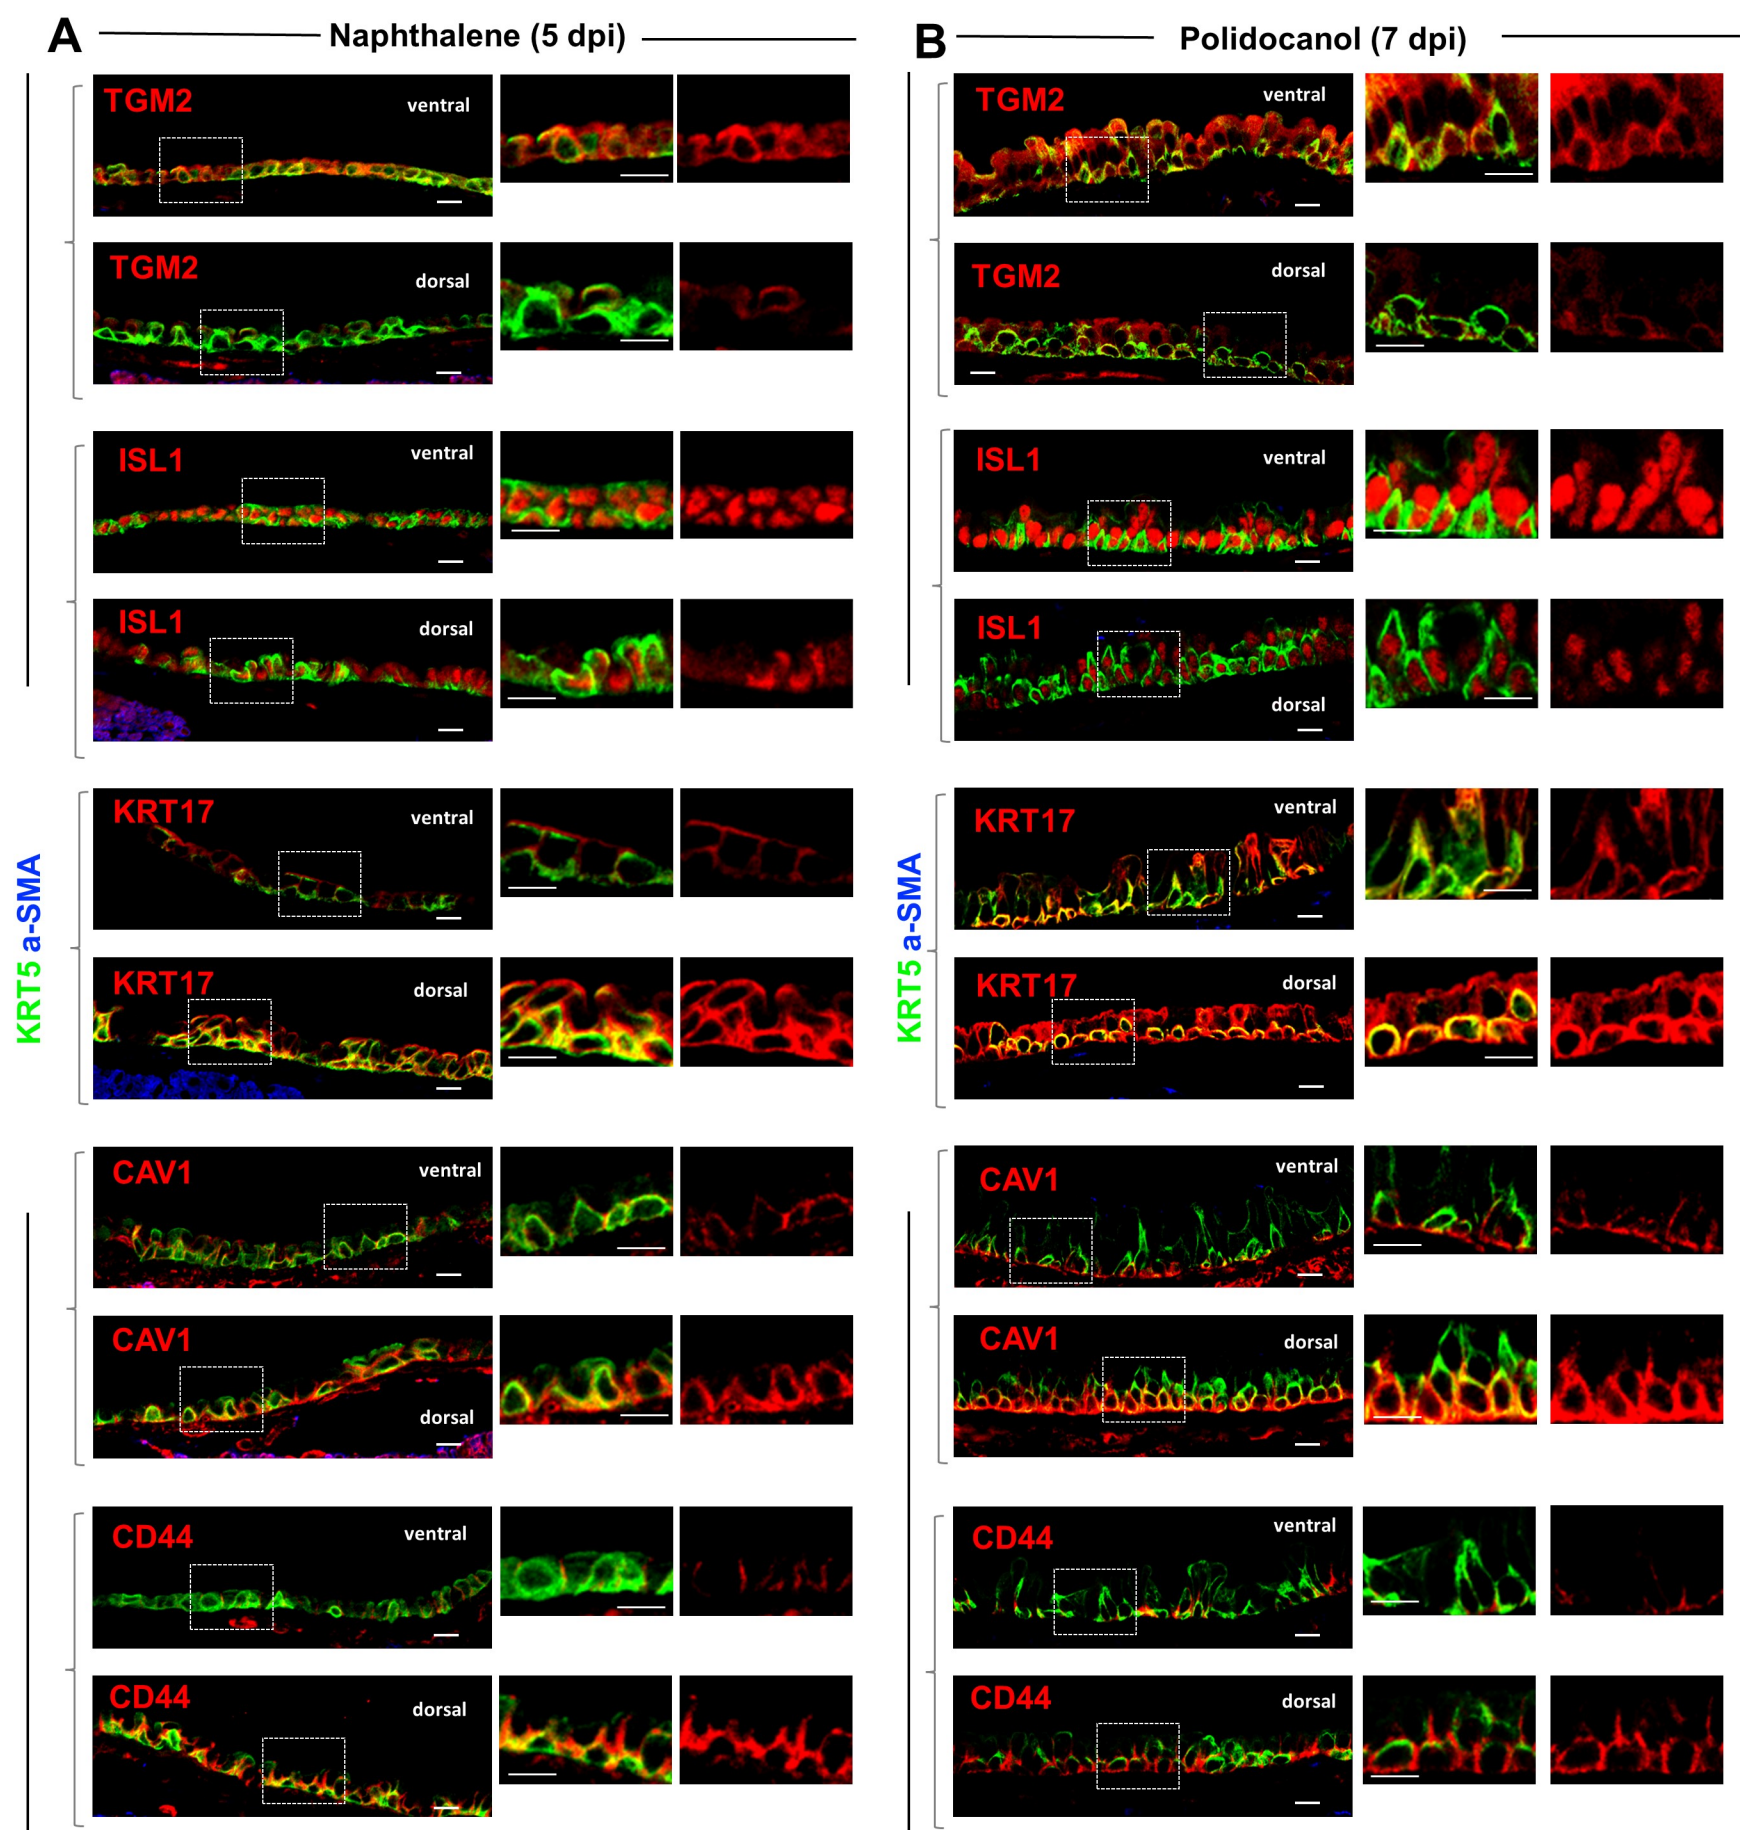

Figure 5-figure supplement 2

Supplement: supp [file elife-80083-supp-v1.zip › elife_poa_e80083_Figure_5_figure_supplement_2.pdf]

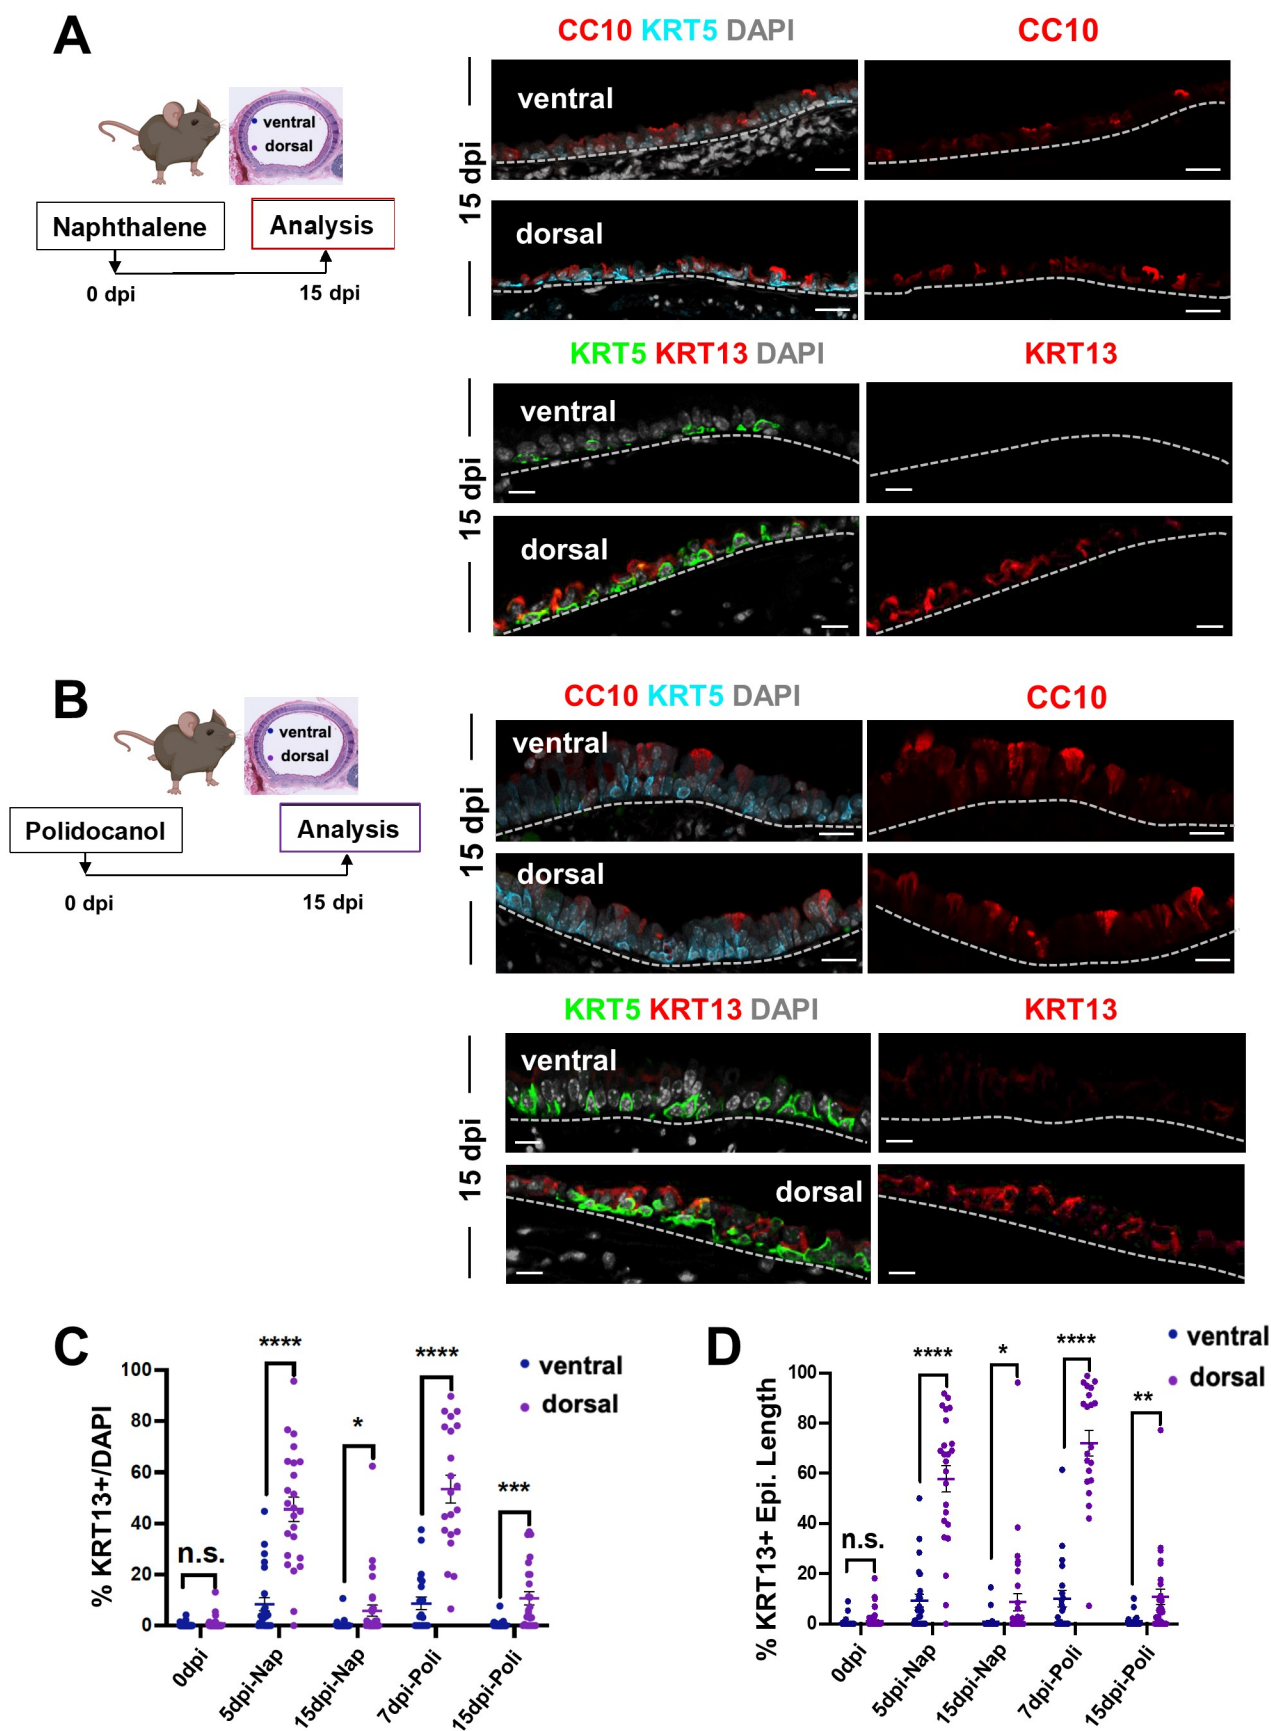

Figure 5-figure supplement 3

Supplement: supp [file elife-80083-supp-v1.zip › elife_poa_e80083_Figure_5_figure_supplement_3.pdf]
